# Supplementary material for: A Salmonella Microfluidic Chip Combining Non-Contact Eddy Heater and 3D Fan-Shaped Mixer with Recombinase Aided Amplification
Source: Biosensors (Basel). 2022 Sep 5;12(9):726. doi: 10.3390/bios12090726 (PMC9496460; doi:10.3390/bios12090726)
Supplement: Supplementary file 1 [file biosensors-12-00726-s001.zip]

Archive with 4 entries (4 files):
- biosensors-1851670-supplementary.pdf
- video.S1 Lysis section.mp4
- video.S2 Mixing section.mp4
- video.S3 Mixing rate .mp4
